# Supplementary material for: LC-MS- and 1H NMR-Based Metabolomics to Highlight the Impact of Extraction Solvents on Chemical Profile and Antioxidant Activity of Daikon Sprouts (Raphanus sativus L.)
Source: MDPI journal article supplement (doi:10.3390/antiox12081542), 2023-08-01
Supplement: s1 [file s1]

*Supplementary Material*

**LC-MS- and <sup>1</sup>H NMR-based metabolomics to highlight the impact of extraction solvents on chemical profile and antioxidant activity of daikon sprouts (*Raphanus sativus* L.)**

Ciro Cannavacciuolo <sup>1,2,a</sup>, Antonietta Cerulli <sup>1,a</sup>, Verena M. Dirsch <sup>3</sup>, Elke H. Heiss <sup>3</sup>, Milena Masullo <sup>1</sup>, Sonia Piacente <sup>1,\*</sup>

<sup>a</sup>Dipartimento di Farmacia, Università degli Studi di Salerno, via Giovanni Paolo II n. 132, 84084 Fisciano (SA), Italy

<sup>b</sup>PhD Program in Drug Discovery and Development, Università degli Studi di Salerno, via Giovanni Paolo II n. 132, I-84084 Fisciano, SA, Italy.

<sup>c</sup>Department of Pharmaceutical Sciences, University of Vienna, Althanstrasse 14, 1090 Vienna, Austria

<sup>1</sup> contributed equally.

\* Corresponding author: Tel.: +39 089969763; Fax: +39 089969602

E-mail addresses: [piacente@unisa.it](mailto:piacente@unisa.it)

## List of Supporting Information

**Figure S1.** HRMS/MS spectra of compound **10**.

**Figure S2.**  $^1\text{H}$  NMR Spectrum (600 MHz,  $\text{CD}_3\text{OD}$ ) of compound **16**.

**Figure S3.**  $^{13}\text{C}$  Spectrum (150 MHz,  $\text{CD}_3\text{OD}$ ) of compound **16**.

**Figure S4.** 1D-TOCSY spectrum (600 MHz,  $\text{CD}_3\text{OD}$ ) of compound **16**.

**Figure S5.** HSQC Spectrum ( $\text{CD}_3\text{OD}$ ) of compound **16**.

**Figure S6** HMBC Spectrum ( $\text{CD}_3\text{OD}$ ) of compound **16**.

**Figure S7.** COSY Spectrum ( $\text{CD}_3\text{OD}$ ) of compound **16**.

**Figure S8.** ROESY Spectrum ( $\text{CD}_3\text{OD}$ ) of compound **16**.

**Table S1.** Total Phenolic Content, DPPH $\cdot$  and ABTS $^{\bullet+}$  radical scavenging activity of polar extracts of daikon sprouts

**Table S2.** Characteristic  $^1\text{H}$  NMR peaks identified in *R. sativus*.

**Figure S9.**  $^1\text{H}$  NMR spectra of different extracts of *R. sativus* sprouts

**Figure S10.**  $^1\text{H}$  NMR spectrum of MeOH extract of *R. sativus* sprouts with primary and specialized metabolites.

**Figure S11.** Principal component analysis of *R. sativus* extracts obtained by untargeted analysis. (A) PCA score scatter plot; (B) PCA loading plot.

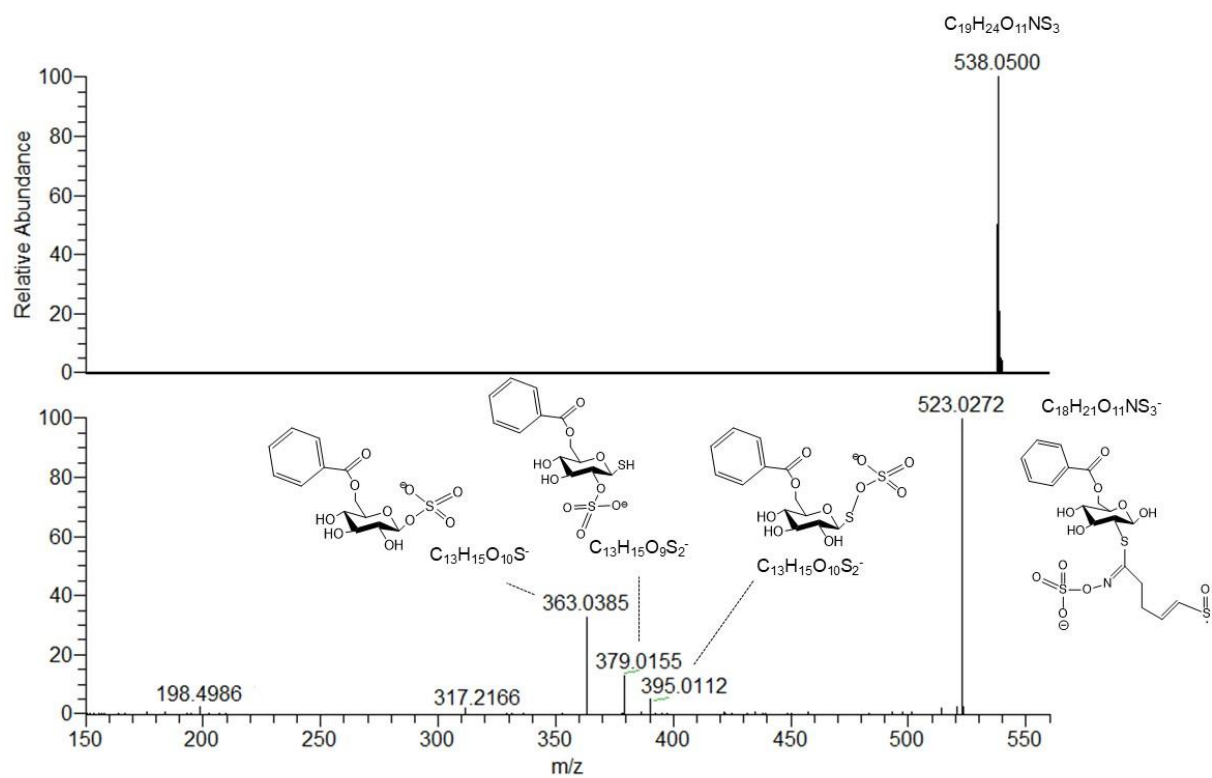

Fig. S1. HRMS/MS spectra of compound 10

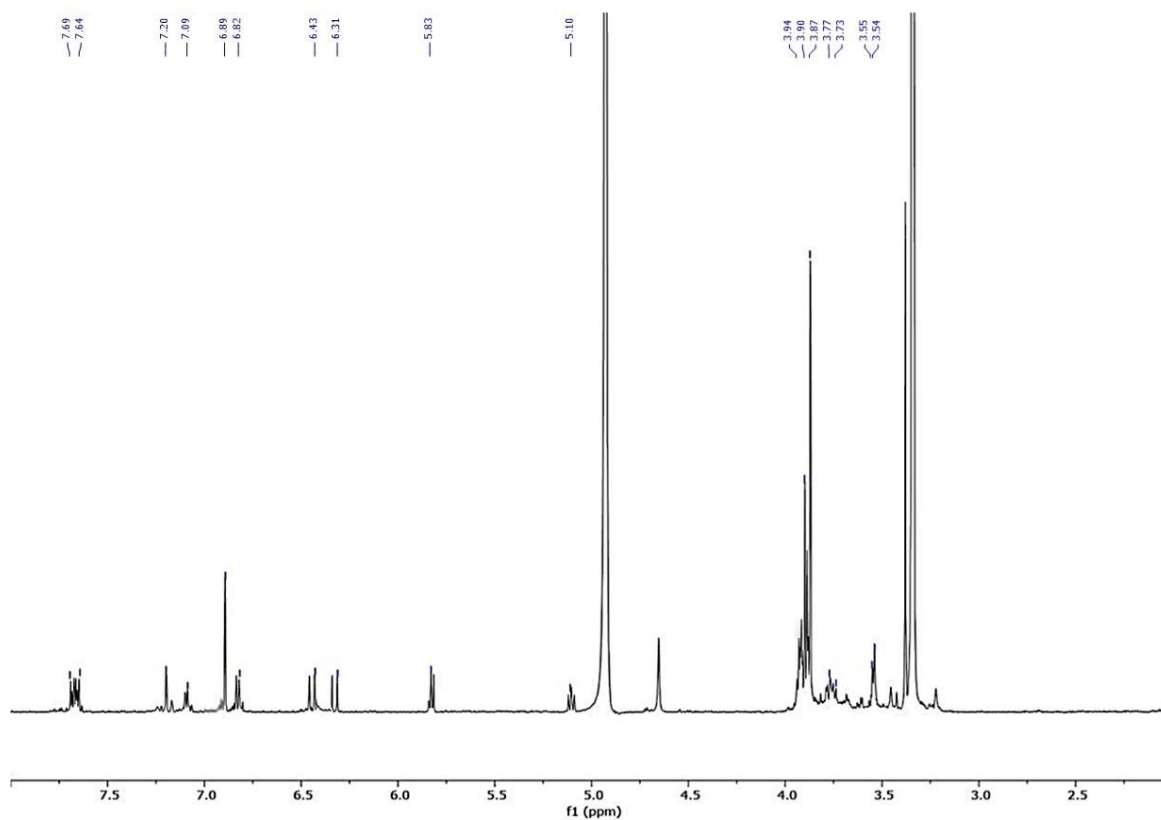

**Fig. S2.**  $^1\text{H}$  NMR Spectrum (600 MHz,  $\text{CD}_3\text{OD}$ ) of compound **16**.

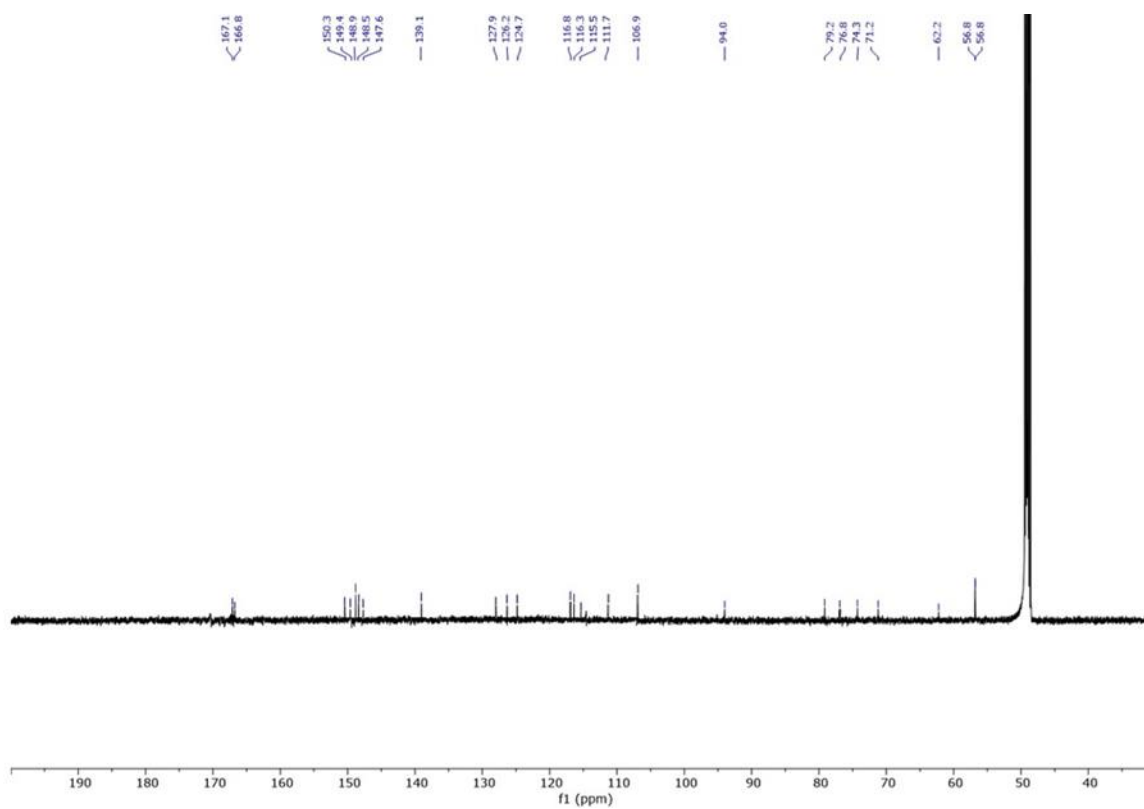

**Fig. S3.**  $^{13}\text{C}$  Spectrum (150 MHz,  $\text{CD}_3\text{OD}$ ) of compound **16**.

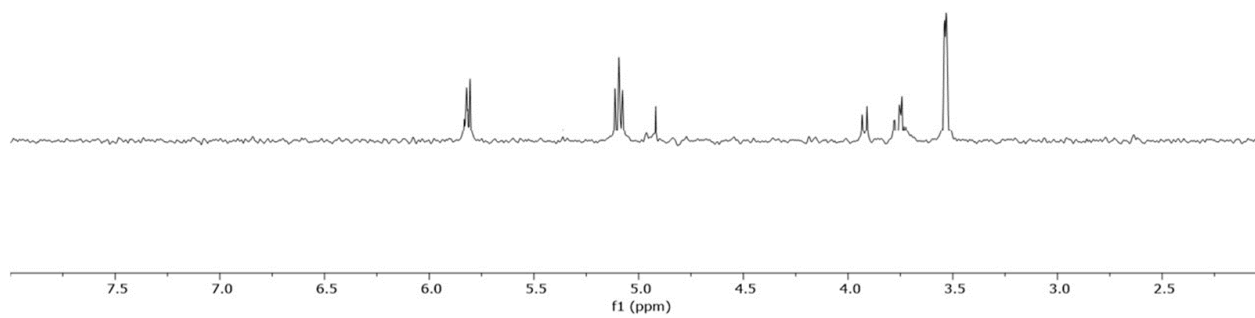

**Fig. S4.** 1D-TOCSY spectrum (600 MHz,  $\text{CD}_3\text{OD}$ ) of compound **16**.

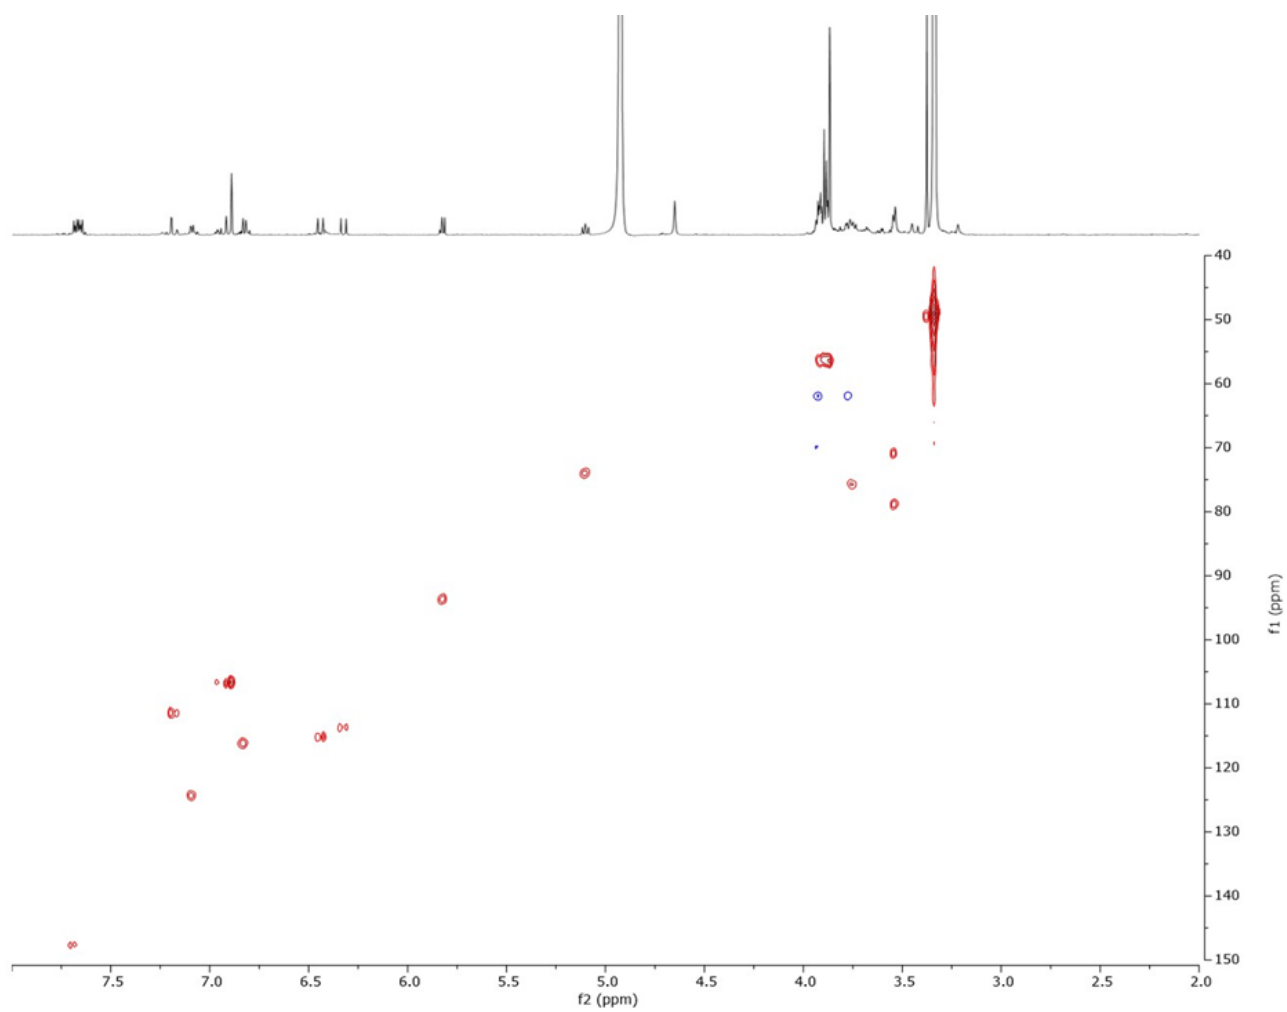

**Fig. S5.** HSQC Spectrum (CD<sub>3</sub>OD) of compound 16.

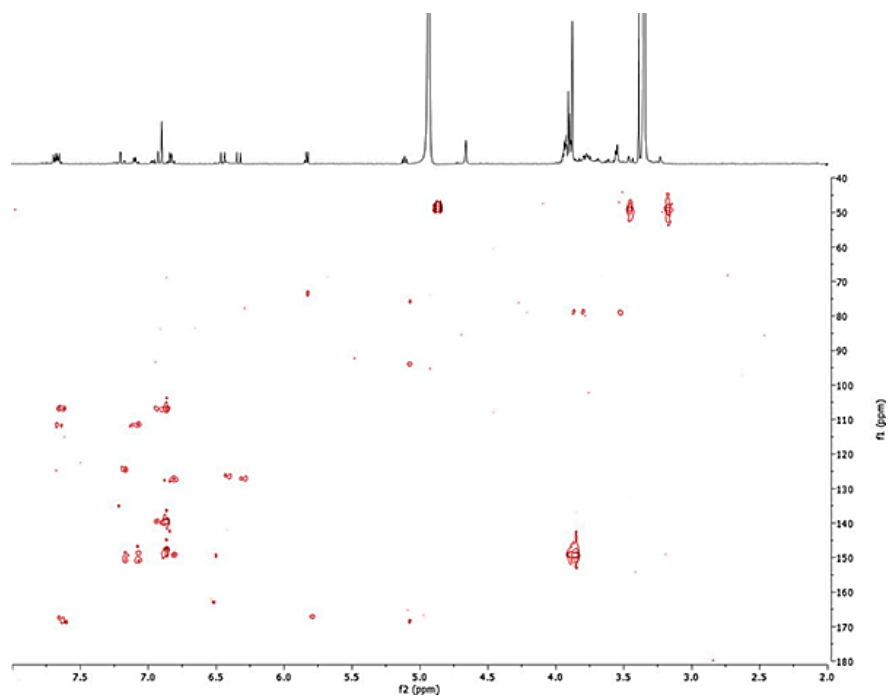

**Fig. S6.** HMBC Spectrum ( $\text{CD}_3\text{OD}$ ) of compound **16**.

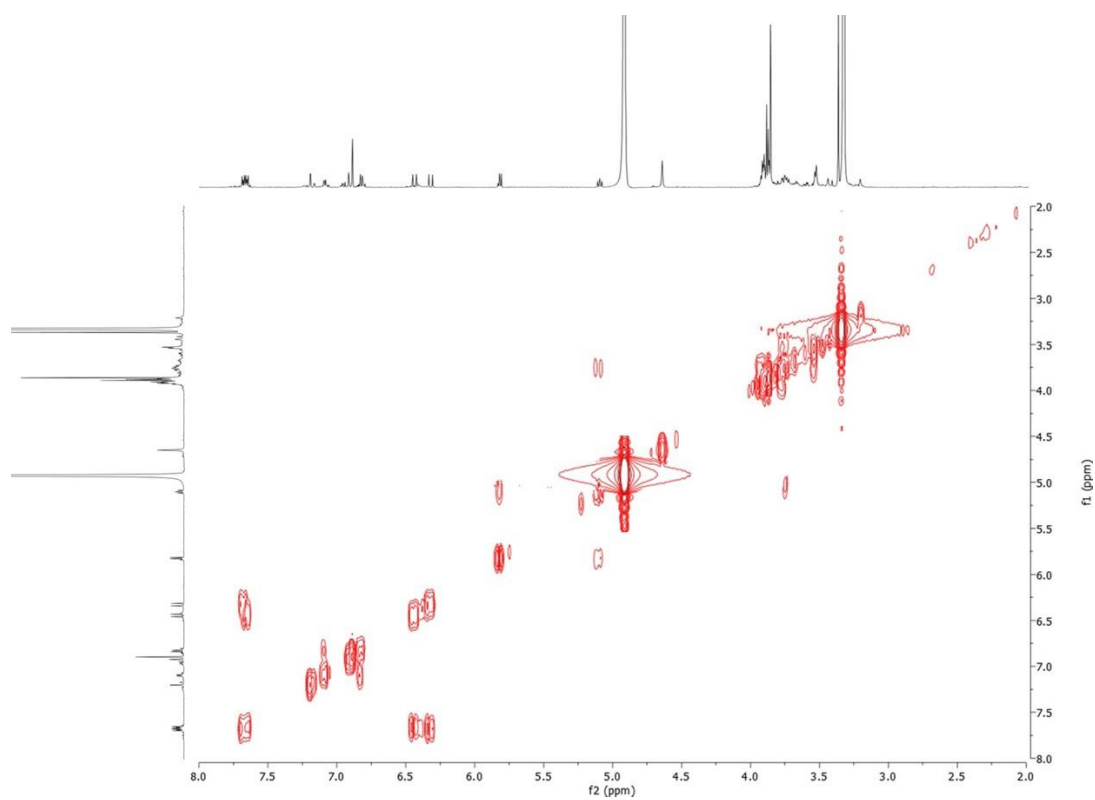

**Fig. S7.** COSY Spectrum ( $\text{CD}_3\text{OD}$ ) of compound **16**.

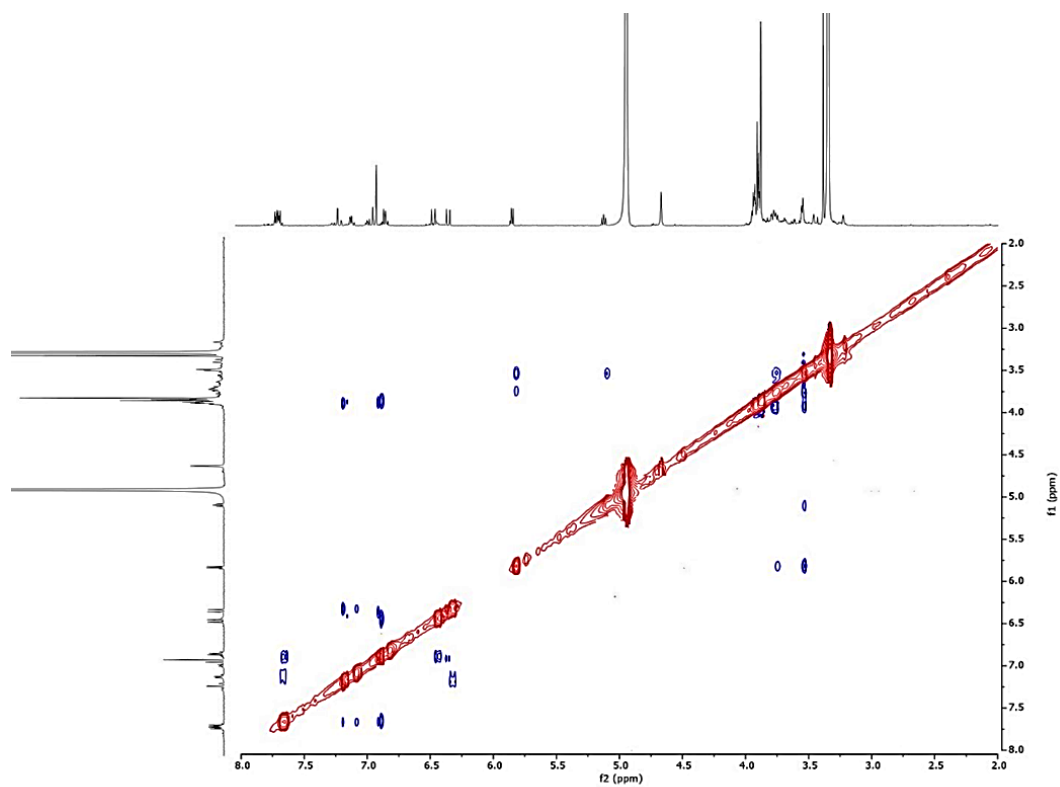

**Fig. S8.** ROESY Spectrum (CD<sub>3</sub>OD) of compound **16**.

**Table S1.** Total Phenolic Content, DPPH• and ABTS<sup>•+</sup> radical scavenging activity of polar extracts of daikon sprouts

| EXTRACTS                  | Total Phenolic Content <sup>a</sup><br>(GAE <sup>A</sup> ± SD) | DPPH• <sup>b</sup><br>(IC <sub>50</sub> , µg/mL ± SD) | ABTS <sup>•+</sup> <sup>c</sup><br>(TEAC <sup>B</sup> ± SD) |
|---------------------------|----------------------------------------------------------------|-------------------------------------------------------|-------------------------------------------------------------|
| MeOH                      | 269.36 ± 0.11                                                  | 216.32 ± 0.12                                         | 1.02 ± 0.21                                                 |
| EtOH                      | 283.56 ± 0.13                                                  | 122.43 ± 0.12                                         | 1.70 ± 0.13                                                 |
| 70% EtOH/H <sub>2</sub> O | 400.95 ± 0.33                                                  | 93.97 ± 0.19                                          | 1.95 ± 0.14                                                 |
| 50% EtOH/H <sub>2</sub> O | 322.40 ± 0.28                                                  | 119.93 ± 0.18                                         | 1.34 ± 0.12                                                 |
| Ascorbic acid             | -                                                              | 4.53±0.01µM                                           | -                                                           |
| Quercetin 3-O-gluc        | -                                                              | -                                                     | 1.81 ± 0.19 mM                                              |
|                           |                                                                |                                                       |                                                             |

<sup>a</sup>Values are expressed as gallic acid equivalent (GAE) mg/g of dried extract. <sup>b</sup>Values are expressed as micrograms per milliliter (µg/mL); <sup>c</sup>Values are expressed as concentration (mM) of a standard Trolox solution exerting the same antioxidant activity of a 1 mg/mL solution of textured extract.

**Table S2.** Characteristic  $^1\text{H}$  NMR peaks identified in *R. sativus*.

| Compound                                                                                                                                  | $^1\text{H}$ chemical shifts<br>(multiplicity, in Hz) |
|-------------------------------------------------------------------------------------------------------------------------------------------|-------------------------------------------------------|
| Phytosterol (PS)                                                                                                                          | 0.78 (m)                                              |
| Valine (Val)                                                                                                                              | 0.98 (d, 7.0)                                         |
| Isoleucine (Ile)                                                                                                                          | 1.01 (s)                                              |
| Fatty Acids (FA)                                                                                                                          | 1.33 (m)                                              |
| Alanine (Ala)                                                                                                                             | 1.49 (d, 7.1)                                         |
| gamma-Aminobutyric acid (GABA)                                                                                                            | 2.30 (t, 7.3)                                         |
| Succinic acid (SA)                                                                                                                        | 2.50 (m)                                              |
| Sulfoxide glucosinolates (SO-Gls)                                                                                                         | 2.70 (bt, 7.1)                                        |
| Aspartic acid (Asp)                                                                                                                       | 2.85 (dd, 17.3, 3.7)                                  |
| Methylsinapate ( <b>5</b> )                                                                                                               | 3.82 (s)                                              |
| Malic acid (MLA)                                                                                                                          | 4.27 (dd, 4.0, 8.0)                                   |
| $\beta$ -glucose ( $\beta$ -glc)                                                                                                          | 4.50 (d, 8.0)                                         |
| $\alpha$ -glucose ( $\alpha$ -glc)                                                                                                        | 5.14 (d, 3.6)                                         |
| Polyunsaturated fatty acids (PUFA)                                                                                                        | 5.38 (m)                                              |
| Sucrose (Suc)                                                                                                                             | 5.40 (d, 3.8)                                         |
| 1,2- <i>O</i> -Disinapoyl- $\beta$ -D-glucopyranoside ( <b>15</b> )                                                                       | 5.82 (d, 8.3)                                         |
| Tyrosine (Tyr)                                                                                                                            | 6.86 (m)                                              |
| 1- <i>O</i> -Feruloyl-2- <i>O</i> -sinapoyl- $\beta$ -D-glucopyranoside ( <b>16</b> )                                                     | 7.20 (d, 1.9)                                         |
| Indolic glucosinoates                                                                                                                     | 7.24 (s)                                              |
| 3,4,6'- <i>O</i> -Trisinapoylsucrose ( <b>17</b> )                                                                                        | 7.50 (d, 15.8)                                        |
| Sinapic acid ( <b>11</b> )                                                                                                                | 7.54 (d, 15.8)                                        |
| 3- <i>O</i> -Sinapoyl-6'- <i>O</i> -sinapoyl-sucrose ( <b>12</b> ),<br>3- <i>O</i> -Feruloyl-6'- <i>O</i> -sinapoyl-sucrose ( <b>14</b> ) | 7.71 (d, 15.8)                                        |
| 1- <i>O</i> -Sinapoyl- $\beta$ -D-glucopyranoside ( <b>6</b> ),<br>1- <i>O</i> -Feruloyl- $\beta$ -D-glucopyranoside ( <b>7</b> )         | 7.74 (d, 15.8)                                        |



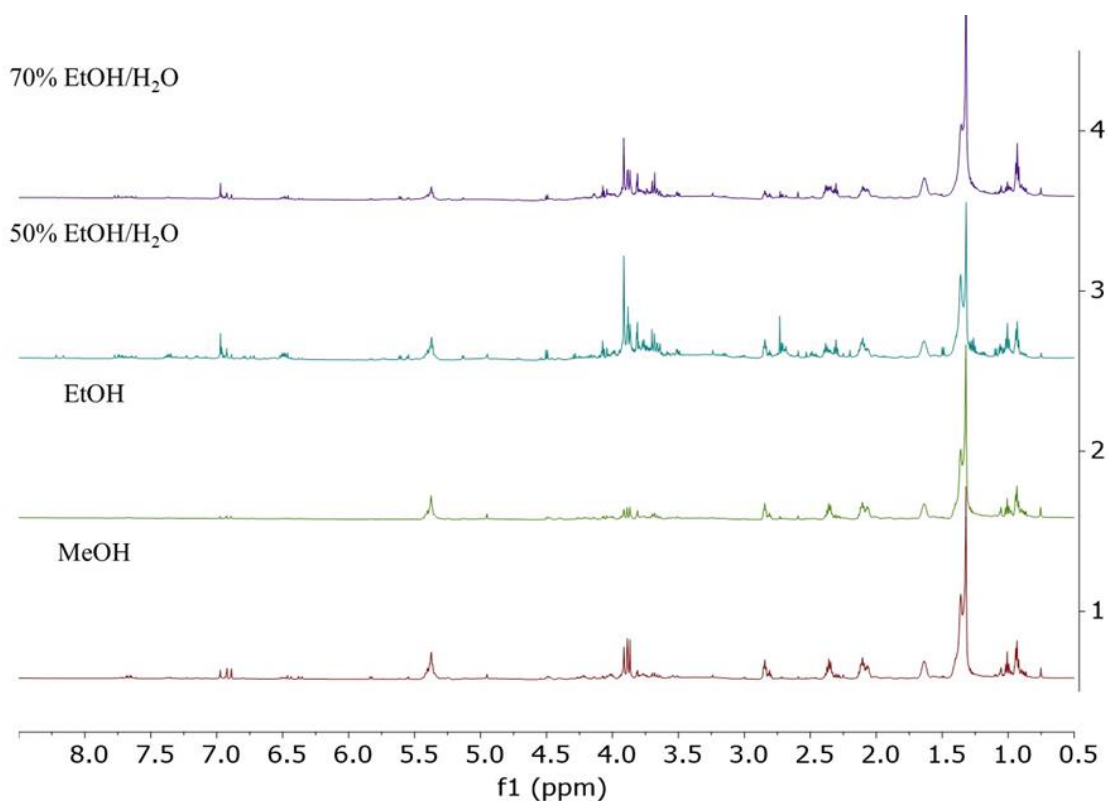

**Fig. S9.**  $^1\text{H}$  NMR spectra of different extracts of *R. sativus* sprouts

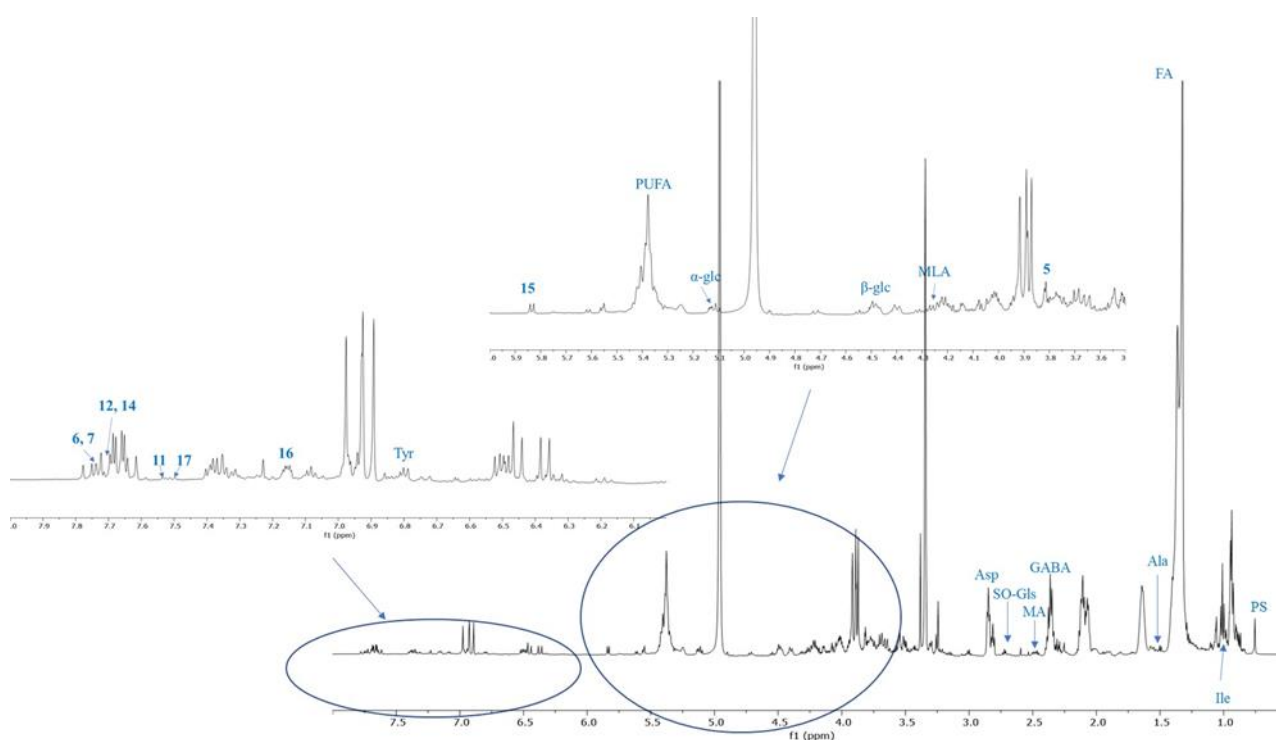

**Fig. S10.**  $^1\text{H}$  NMR spectrum of MeOH extract of *R. sativus* sprouts with primary and specialized metabolites.

**Legend:** (Ala) Alanine; (Asp) Aspartic acid; ( $\alpha$ -Glu)  $\alpha$ -glucose; ( $\beta$ -Glu)  $\beta$ -glucose; (Chol) choline; (FA) Fatty acids; (GABA) gamma-aminobutyric acid; (PS) phytosterols; (Ile) Isoleucine; (Ind-Gls) indolic glucosinolates; (MLA) Malic acid; (PUFA) polyunsaturated fatty acids; (SA) Succinic acid; (SO-Gls) sulfoxide glucosinolates; (Suc) sucrose; (Tyr) tyrosine, (Val) Valine; (5) methylsinapate; (6,7) 1-O-Sinapoyl- $\beta$ -D-glucopyranoside and 1-

O-Feruloyl- $\beta$ -D-glucopyranoside; (**11**) sinapic acid; (**12**, **14**) 3-O-feruloyl-6'-O-sinapoyl-sucrose and 3-O-sinapoyl-6'-O-sinapoyl-sucrose; (**15**) 1,2-O-disinapoyl- $\beta$ -D-glucopyranoside; (**16**) 1-O-Feruloyl-2-O-sinapoyl- $\beta$ -D-glucopyranoside; (**17**) 3,4-O-disinapoyl-6'-O-sinapoyl-sucrose.

**Fig. S11.** Principal component analysis of *R. sativus* extracts obtained by untargeted analysis. **(A)** PCA score scatter plot; **(B)** PCA loading plot.
